# Supplementary figures and images for: Sputum-to-serum hydrogen sulfide ratio in COPD
Source: HighWire-hosted journal article supplement (doi:10.1136/thoraxjnl-2013-204868), 2014-07-17

**FigE1**

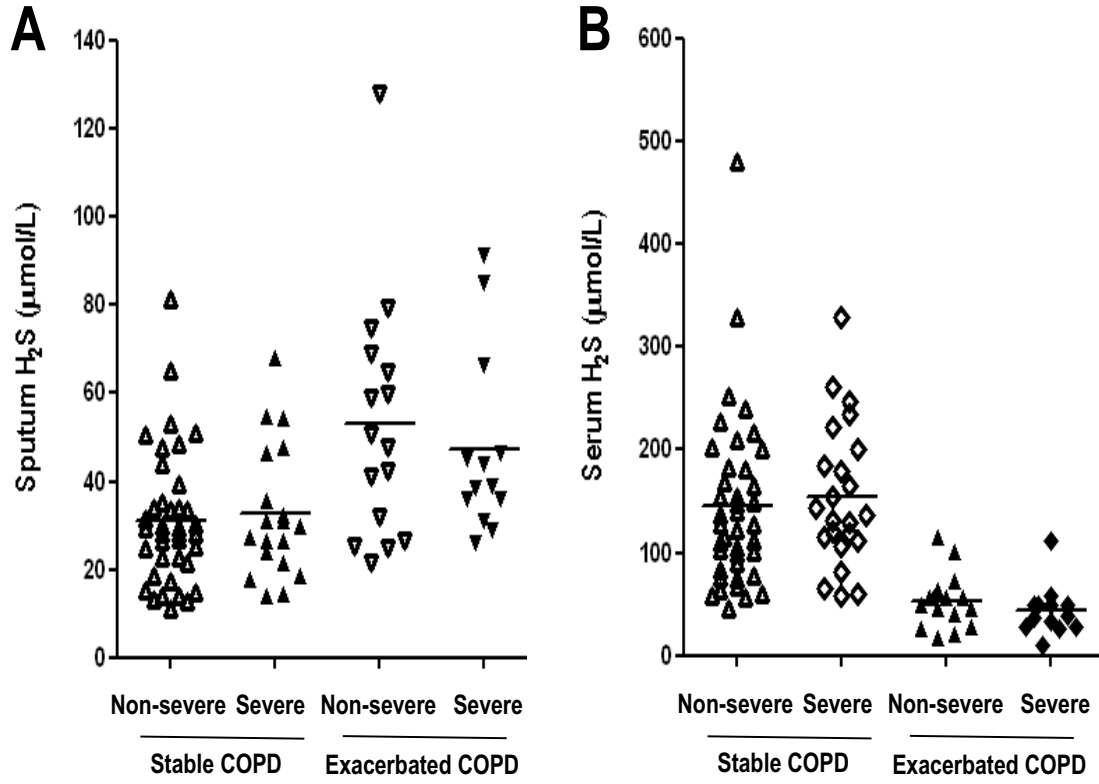

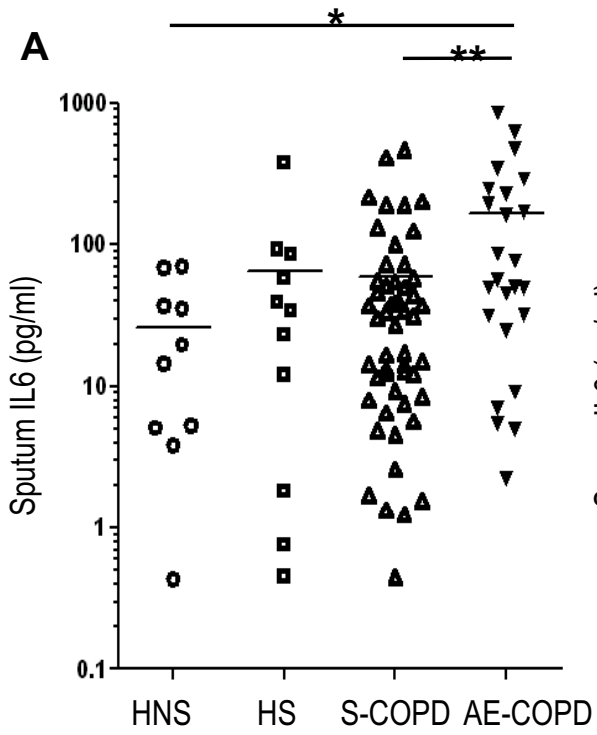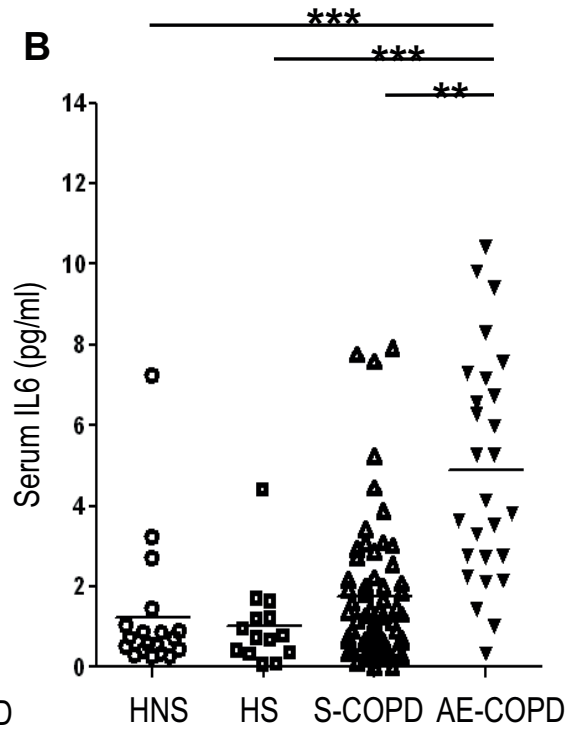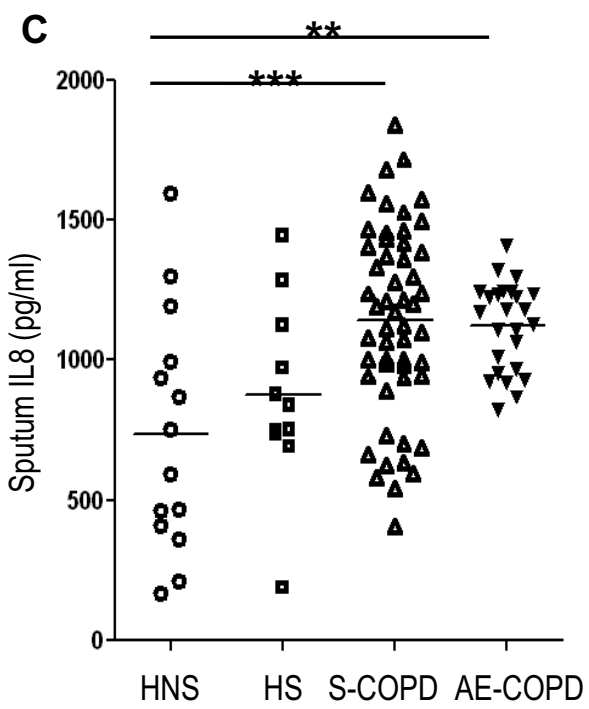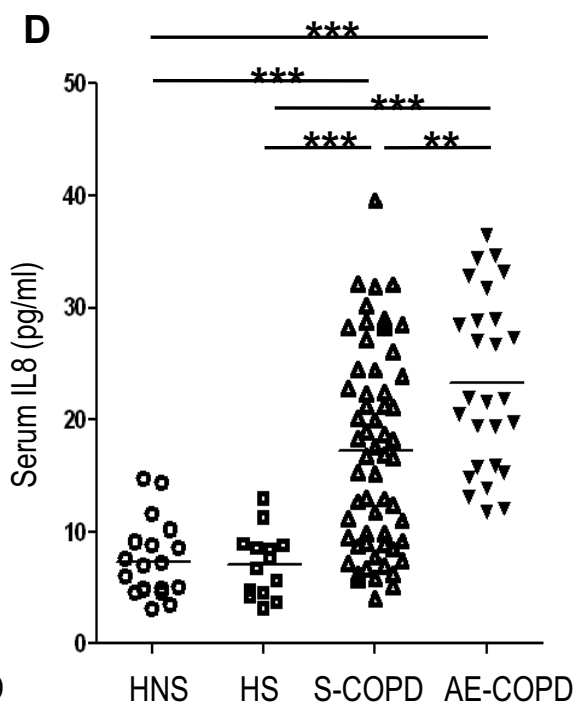

Supplement: thoraxjnl-2013-204868supp.pdf [file thoraxjnl-2013-204868supp.pdf]
